# Supplementary material
Source: PubMed Central journal article supplement (PMC1360542)
Supplement: pnas_0507959103_9.pdf [file pnas_0507959103_9.pdf]

## Supporting Text

### Role of Elasticity in the Flagellar Motor

Here we show that, if elasticity in the system is neglected, the motor torque-speed relation can be quite different under a conservative load and under a viscous load. Consider the general case where a motor moves along spatial potentials,  $V_i(\theta)$ , corresponding to  $i = 1, \dots, m$  chemical states. The governing equations for the motor motion are

$$\partial_t \rho_i(\theta, t) = D \partial_\theta \left[ \frac{\rho_i(\theta, t)}{k_B T} \frac{d}{d\theta} (V_i(\theta) + \tau_{\text{ext}} \theta) + \partial_\theta \rho_i(\theta, t) \right] + \sum_{j \neq i} \left[ K_{ij}(\theta) \rho_j(\theta, t) - K_{ji}(\theta) \rho_i(\theta, t) \right], \quad (1)$$

where  $\partial_\theta \equiv \partial/\partial\theta$ .  $\rho_i(\theta, t)$  is the probability density for the motor to be at position  $\theta$ , time  $t$ , and chemical state  $i$ .  $D$  is the diffusion constant,  $k_B$  is the Boltzmann constant,  $T$  is the temperature,  $V_i(\theta)$  is the potential function in chemical state  $i$ ,  $\tau_{\text{ext}}$  is the external torque, and  $K_{ij}$  is the chemical transition rate from state  $j$  to  $i$ . The steady-state solution is obtained by setting the left side of Eq. 1 to zero. The motor torque  $\tau_M$  is given by

$$\tau_M = \zeta_M v_M + \tau_{\text{ext}} = - \sum_{i=1}^m \int_0^\delta d\theta \rho_i(\theta) \cdot \partial_\theta V_i(\theta), \quad (2)$$

where the motor drag coefficient  $\zeta_M = k_B T / D$ . Thus the motor torque depends on the probability distributions,  $\rho_i(\theta)$ . Eq. 1 shows that the probability distributions depend linearly on the diffusion constant, but exponentially on the external load, since the latter modifies the effective potentials directly and thus has exponential effects on the probability distributions. Thus, one would expect different motor torque-speed relations for purely viscous or conservative loading, as illustrated in Fig. 7b. However, this is not what is experimentally observed for the flagellar motor.

This apparent discrepancy can be resolved if the motor and load are linked by an elastic (not necessarily linear) linkage. At steady state, a motor pulling a cargo through an elastic linkage is described by

$$-\frac{\partial J_\theta(s, \theta, \theta_L)}{\partial \theta} - \frac{\partial J_{\theta_L}(s, \theta, \theta_L)}{\partial \theta_L} + K\rho = 0, \quad (3)$$

where

$$J_\theta(s, \theta, \theta_L) = -D_\theta \left[ \frac{1}{k_B T} \frac{\partial V_s}{\partial \theta} \rho_s + \frac{\partial \rho_s}{\partial \theta} \right], \quad J_{\theta_L}(s, \theta, \theta_L) = -D_{\theta_L} \left[ \frac{1}{k_B T} \frac{\partial V_s}{\partial \theta_L} \rho_s + \frac{\partial \rho_s}{\partial \theta_L} \right], \quad (4)$$

where  $\theta$  and  $\theta_L$  describe motor and load positions, respectively,  $\underline{K}$  is the chemical transition matrix, and  $\rho$  is the probability density of finding the system at the state  $(s, \theta, \theta_L)$ . For simplicity, we assume the linkage is harmonic  $V_s = V_0(\theta) + \frac{1}{2}\kappa(\theta - \theta_L)^2$  with a spring constant  $\kappa$ , but the conclusion holds for more general linkage potentials.

If the system is tightly coupled, i.e. the chemical transitions are, on average, always associated with a fixed mechanical translation distance,  $\theta$ , then the motor can be viewed approximately as diffusion along an effective 1D path (the minimum energy path, or MEP) on the reaction-rotation surface (1). The potential along the effective 1D path in the large scale can be approximated by a linear potential with slope  $\Delta G/\delta$ , but with local features given by  $V(\theta)$ .  $\Delta G$  and  $\delta$  refer to the free energy drop and translocation distance along the mechanical degree of freedom associated with one motor cycle. Then the system can be reduced to a load elastically linked to a motor driven by a 1D tilted potential, which is similar to the problem studied by Elston and Peskin (2). Their main conclusion is that the load experiences a linear effective potential created by the motor in the limit  $D_{\theta_L} / D_\theta \rightarrow 0$ , and  $\kappa \rightarrow 0$ . Rather than reproducing their analysis, we give a heuristic discussion.

With a stiff spring, local features of the potential are important. However, with a very soft spring, the potential can be well approximated by a harmonic potential plus the linear potential  $(\Delta G/\delta)\cdot\theta$ . Consequently, the effective potential experienced by the load is

$$\begin{aligned}
\bar{V}(\theta_L) &= -k_B T \ln \int_{-\infty}^{\infty} d\theta \exp\left(-\frac{1}{k_B T} \left[ V(\theta) + \tau_{ext} \theta_L + \frac{1}{2} \kappa (\theta - \theta_L)^2 \right]\right) \\
&= \tau_{ext} \theta_L - k_B T \ln \int_{-\infty}^{\infty} d\theta \exp\left(-\frac{1}{k_B T} \left[ V(\theta) + \frac{1}{2} \kappa (\theta - \theta_L)^2 \right]\right) \\
&\approx (\tau_{ext} - \Delta G / \delta) \theta_L + \text{constant}
\end{aligned}$$

Therefore, the effect of the viscous load on the motor is to exert a torque with an average value of  $\kappa(\theta - \theta_L)$ , which is balanced by the motor torque in the steady state. The apparent motor torque depends on the relative dynamics between the motor and the load. The motor dynamics is affected by the motor diffusion constant, chemical transition rates, as well as the potential shapes, while the load dynamics is affected only by its diffusion constant and the spring constant.

The effective rate for stator transitions is defined as:  $\bar{k} \sim \int k(\theta_M) \tilde{\rho}(\theta_M) d\theta_M$ ,

where  $\tilde{\rho}(\theta_M) = \int \rho(\theta_M, \theta_L) d\theta_L$ . Therefore,  $\tilde{\rho}$ , and so  $\bar{k}$  are affected by the torque from the load through the spring. When several kinetic processes are involved, the slowest one is rate limiting. We are interested in the case that motor relaxation within the potential well of each chemical state is much faster than chemical transitions and the load relaxation. Then the two relevant time scales in the system are  $1/\bar{k}$ , and  $\zeta/\kappa$ , where  $\kappa$  is the spring constant, and  $\zeta$  is the load drag coefficient. Define the dimensionless ratio  $r = \bar{k} \zeta/\kappa$ . In the limit when (i) the time scale of the load is much longer than that of the motor ( $r \gg 1$ ), (ii) tight coupling holds, and (iii) the linkage is sufficiently soft (i.e., it allows the motor to explore several units of  $\delta$ ),

$$\zeta_L \omega \approx \Delta G / \delta = (\Delta H - T \Delta S) / \delta. \quad (5)$$

From this equation, it is clear that, in this limit, (i) the speed scales linearly with temperature, and (ii) the calculated motor torque-speed curves under conservative load and under viscous load are identical (see Fig. 7b). Therefore, for most of the results reported in this work, we used the 1-D calculations under a conservative load.

In the case that the system is not perfectly tightly coupled between chemical transitions and mechanical motion [which is likely in the case of mycoplasma (3)], Eq. 5 can be generalized to

$$\zeta_L \omega \approx \Delta G / \delta = f(\Delta H - T\Delta S) / \delta, \quad (6)$$

where  $f$  takes the value between 0 and 1.

## Computational Details

The chemical transitions are modeled as

$$k_0 = f k_m, \quad (7)$$

Where

$$f = \begin{cases} \frac{\theta - \theta_\alpha}{\frac{1}{2}(\theta_\beta - \theta_\alpha)}, & \text{for } \theta_\alpha < \theta < \frac{1}{2}(\theta_\alpha + \theta_\beta) \\ \left( 1 - \frac{\theta - \frac{1}{2}(\theta_\alpha + \theta_\beta)}{\frac{1}{2}(\theta_\beta - \theta_\alpha)} \right) & \text{for } \frac{1}{2}(\theta_\alpha + \theta_\beta) < \theta < \theta_\beta \\ 0 & \text{otherwise} \end{cases},$$

is the transition window related to the rotor-stator interactions, and  $\theta$  is the angular position of the rotor. The expression for the transitions happened in the second window is obtained by shifting all the angular coordinates in the above expressions by half of the rotor cycle  $2\pi/26$ .

We solved the steady-state Fokker-Planck equations for the 1D case (with the rotor subject to a conservative load or rigidly linked to a viscous load), and for the 2D case (with the rotor elastically linked to a viscous load). For the 1D calculations, and the 2D calculations with  $\leq 4$  stators, the algorithm developed by Xing *et al.* (4) allows solving the coupled Fokker-Planck equations directly. In our calculations, we found that results converged with 16 subregions within one rotor period  $\delta = 2\pi/26$  for each degree of freedom. The steady-state probability density function can be defined within the range  $\theta \in [0, \delta]$ , and  $\theta_L \in [\theta - \theta_a, \theta + \theta_b]$ . The range of  $\theta_L$  is chosen to be large enough so that for a given  $\theta$  the density at the boundary is negligible (due to the elastic linkage between the motor and the load). Two types of boundary conditions are used for transitions out of the working region. At a given  $\theta$ , absorbing boundary conditions

are used for transitions out of the range of  $\theta_L$ , thus the transition rates are zero. For transitions that move the system out of the range  $\theta \in [0, \delta]$ , the following symmetry holds:  $\rho_s(\theta, \theta_L) = \rho_s(\theta + \delta, \theta_L + \delta)$ . The computational grid is illustrated in Fig. 11. The steady-state solutions are obtained by solving the linear equations with the MATLAB built-in solver, and the steady state rotation rates  $\omega$  are then calculated from the steady-state solution. The motor torque is calculated from the relation  $(\zeta_\theta + \zeta_{\theta_L})\omega = \tau_M$ .

Noticing the equivalent motor torque-speed relations for the motor system under a conservative load and a viscous load elastically linked to the motor, the pmf dependence results were obtained in the following way. First the motor torque-speed relations with various pmf were calculated for the motor system under conservative loads. Then the rotation speed for a given load with drag coefficient  $\zeta$  was the intersection between the load line  $\zeta\omega$  and the motor torque speed curve with certain pmf.

All the Fokker-Planck results were also tested against results obtained by Langevin trajectory calculations. Stochastic simulations were done for the Langevin trajectories (Wiener Process) in the following way:

$$\theta(t + \Delta t) = \theta(t) - \frac{D_\theta}{k_B T} \frac{\partial V_s}{\partial \theta} \Delta t + \sqrt{2D_\theta \Delta t} \xi_\theta(t), \quad (8)$$

where  $\xi(t)$  is a normal random variable with zero mean and unit variance (5, 6), and the angular coordinate  $\theta$  is actually a two-component vector  $(\theta, \theta_L)$  in the case of motor elastically linked to a viscous load. The chemical state of each stator is updated simultaneously by the following rule. In chemical state  $s$  at time  $t$ , the probability of a transition to chemical state  $s'$  is determined by the corresponding chemical rates  $k_{s \rightarrow s'} \Delta t$  for  $s' \neq s$ , and  $1 - \sum_{s \neq s'} k_{s \rightarrow s'} \Delta t$  for  $s' = s$ . The destination state is chosen using a Monte Carlo scheme (7). In all of calculations, the step size is  $\Delta t = 10^{-11}$  s. The rotation rate is determined by the difference between the final and initial motor positions within the given time interval. The final results are obtained by averaging over 10 trajectories, each 0.06s long. Results with the two methods agree within numerical errors.

All the model parameters used in this work are given in Table 1. To fit the data shown in Fig. 3, we tuned the rate constant  $k_m$  and the right boundary of the transition window  $\theta_\beta$  in Eq. 7.

## Details Not Resolved by the Model

Here we discuss some details that cannot be resolved by our current model and propose several competing schemes. Further experimental studies must be performed to resolve these issues.

For an ion-driven motor, the ion-transport complex {MotA<sub>4</sub>MotB<sub>2</sub> for proton BFM, and rotor/stator for the F<sub>o</sub> motor (8)] must exist in at least two conformations, which open alternately to the cytoplasm or periplasm. When the ion-transport complex is in the conformation where the half channel is open to the periplasm (p), an ion can hop onto a channel site. A protein reorganization transforms to the conformation where the cytoplasm half-channel is open (c) whereupon the ion can dissociate into the cytoplasm. To utilize the free energy associated with the transporting ion for mechanical work, the two half channels must be dislocated or the connection between them blocked so that an ion cannot access the cytoplasm directly from the periplasm; the transformation between the two conformations can be used to generate mechanical work. Fig. 12 gives the minimal kinetic path that a complex must follow.

Experimentally, it has been shown that the interface between MotA and MotB contains the ion pathway of the BFM. Blair and coworkers showed that the MotA/MotB interface is solvent accessible for about one third of the way from either end (9). This finding is consistent with a model structure proposed by Zhai *et al.* (10). Residues D32 are the only requisite binding sites for ions, and may expose to the two sides of the membrane alternatively (11). The MotA<sub>4</sub>MotB<sub>2</sub> probably behaves analogously to a transporter; indeed, genetic studies show homology between the stator and transporters (10). If the energy of ion binding drives the conformational change, then we expect that for the occupied state, conformation C is preferred, and for the empty state, conformation P is preferred. Thus a half stator switches between its two conformations triggered by ions hopping on and off D32. Reorganization of the complex makes possible hydrogen bond breaking and reforming between the twin D32s and the transported ions (protons or sodiums) and the two hydrophilic regions on MotAs that extend to the cytoplasm and periplasm, respectively. This model is analogous to the electron-transfer process described by classical Marcus theory, where solvent reorganization makes electron hopping energetically allowed (12, 13). For

protons, significant tunneling effects may occur in this step, which may explain the observed isotope effect (14).

Motions of the trans-membrane helices result in motions of the cytoplasmic loop between MotA helix 2 and 3 which contacts the rotor electrostatically and/or sterically. The loop motion can be up-and-down (which would require an inclined rotor-stator contact surface as shown in the accompanying movie), rotational as proposed by Schmitt (15) or, most likely, a combination of the two motions (as illustrated in Fig. 5a). Residues like Pro-173 and -222 may function on transforming the helix motion to the loop motion (16).

The actual situation is more complicated since there are two half stators (which compose two ion channels). Berg (17) has shown that the duty ratio of the flagellar motor must be close to one even if only one stator works. Thus, the two half stators must work cooperatively so that the stator is always engaged. There are two possible schemes for the two half stators.

- *Scheme 1:* The two half channels both assume either conformation P or C. Binding of one ion from the periplasm enhances binding of the second ion. Then the MotA<sub>4</sub>MotB<sub>2</sub> complex with conformation O<sub>p</sub>O<sub>p</sub> becomes mechanically unstable, and transforms to conformation O<sub>c</sub>O<sub>c</sub>. Two ions are released to the cytoplasm, which leaves the MotA<sub>4</sub>MotB<sub>2</sub> complex with conformation E<sub>c</sub>E<sub>c</sub> mechanically unstable, and it transforms back to conformation E<sub>p</sub>E<sub>p</sub>. Two cytoplasmic loops from the two half stators become engaged with the rotor alternatively corresponding to the two conformational changes to generate the two power strokes. A schematic cartoon movie with a rotor-stator arrangement consistent to the stator model proposed by Blair and coworkers is included.
- *Scheme 2:* mutual steric constraints within the MotA<sub>4</sub>MotB<sub>2</sub> complex require that if one half channel assumes conformation P, then the other one must assume conformation C, and vice versa. Conformational changes happen between O<sub>p</sub>E<sub>c</sub> and O<sub>c</sub>E<sub>p</sub>, and between E<sub>c</sub>O<sub>p</sub> and E<sub>p</sub>O<sub>c</sub>.

A schematic illustration of a rotor-stator arrangement consistent with the stator model proposed by Blair and coworkers is shown in Fig. 5a.

Our proposed schemes are closely related to the kinematic models proposed by Lauger (18), Blair (19, 20), and Schmitt (15). The two-state model used in this work is a consequence of

assuming that the MotA/MotB conformational change is much slower than other steps, and that co-operative proton binding reduces the four possible ion-binding states to two. Both of the above two schemes are consistent with the high duty ratio requirement, but further experimental studies are needed for conclusive distinctions. In the current work we have used Scheme 1; however, all the conclusions hold as well for Scheme 2.

Finally, the flagellar motor can rotate in both clockwise (CW) and counter-clockwise (CCW) directions. A possible switching mechanism is shown in Fig. 5*b*.

Issues that need to be addressed in future studies are:

- MotB is attached to the peptidoglycan layer by a long loop, and there is a long cytoplasmic loop between Helix 2 and 3 of the MotA. A certain degree of elasticity may be associated with these loops that may affect motor function.
- Stators may interact with one another (e.g., mutual exclusion due to steric constraints). This may affect the stator dynamics by affecting synchronization.
- We did not explore how stator distributions affect the motor dynamics, e.g., Vernier mismatch effects (21). An especially interesting question is the recovery pattern during resurrection experiments may not be unique. For example, if two stators recover, they can be either neighbors or separated by one or more stators. Will this produce different torque-speed curves?
- A more detailed treatment of the stator chemical states than we have used is probably necessary. For this purpose mechano-chemical measurements at different pH and membrane potentials are needed.

## **More on pmf Dependence at High Speed**

Here we will show that the weak pmf dependence at high speed can be explained if conformational changes much slower than ion hopping rates are involved within the stator. The crude theoretical analysis given below gives a general pmf dependence of the rotation rate at very small external load as



$$\omega \propto f = \frac{(1 - e^{-2pmf})}{1 + \alpha e^{-pmf} + \beta e^{-2pmf}}. \quad (9)$$

As expected, the linear dependence on pmf at small pmf can be achieved by Taylor expanding the above expression in the pmf. Fig. 9 shows that the above formula can be used to fit the observed “linear” pmf dependence at high speed (22).

To go beyond the analysis discussed here, we need to construct a more detailed model that treats the concentration gradient, and the membrane potential explicitly. However, these require more systematic and reliable experimental measurement, which is under way.

Here we use the scheme shown in Fig. 9 to show the derivation of Eq. 9. The free energy of each state can be given approximately by

$$G_2 = G_3 \sim G_1 - G_{Ep} + G_{Op} - \ln(C_p / C_0)$$

$$G_4 \sim G_1 - 2G_{Ep} + 2G_{Op} - \ln(C_p^2 / C_0^2)$$

$$G_5 \sim G_1 - 2G_{Ep} + 2G_{Oc} - \ln(C_p^2 / C_0^2)$$

$$G_6 = G_7 \sim G_1 - 2G_{Ep} + G_{Oc} + G_{Ec} - \ln(C_p^2 / C_c C_0)$$

$$G_8 \sim G_1 - 2G_{Ep} + 2G_{Ec} - \ln(C_p^2 / C_c^2).$$

Here the energy is in units of  $k_B T$ . Then

$$P_1 \sim \frac{\exp(-G_1)}{\sum_{i=1}^4 \exp(-G_i)} P_I \sim \frac{1}{\left(1 + e^{(G_{Ep} - G_{Op}) + \ln(C_p / C_0)}\right)^2} P_I$$

$$p_4 \sim \frac{\exp(-G_4)}{\sum_{i=1}^4 \exp(-G_i)} p_I$$

$$\sim \frac{e^{2(G_{Ep} - G_{Op}) + \ln(C_p/C_0)}}{\left(1 + e^{(G_{Ep} - G_{Op}) + \ln(C_p/C_0)}\right)^2} p_I$$

$$p_5 \sim \frac{\exp(-G_5)}{\sum_{i=5}^8 \exp(-G_i)} p_{II}$$

$$\sim \frac{e^{2(G_{Ec} - G_{Oc}) + 2 \ln(C_c/C_0)}}{\left(1 + e^{(G_{Ec} - G_{Oc}) + \ln(C_c/C_0)}\right)^2} p_{II}$$

$$p_8 \sim \frac{\exp(-G_8)}{\sum_{i=5}^8 \exp(-G_i)} p_{II}$$

$$\sim \frac{1}{\left(1 + e^{(G_{Ec} - G_{Oc}) + \ln(C_c/C_0)}\right)^2} p_{II}$$

and

$$\frac{k_a}{k_a^{-1}} = e^{2(G_{Ec} - G_{Ep})}, \quad \frac{k_b}{k_b^{-1}} = e^{-2(G_{Oc} - G_{Op})}.$$

Since,

$$\frac{dp_I}{dt} = p_8 k_a + p_5 k_b^{-1} - p_4 k_b - p_1 k_a^{-1}, \quad p_I + p_{II} = 1,$$

one has,

$$\begin{aligned}
\frac{dp_I}{dt} &= p_8 k_a + p_5 k_b^{-1} - p_4 k_b - p_1 k_a^{-1} \\
&= \frac{k_a + e^{2(G_{Ec} - G_{Oc}) + 2 \ln(C_c / C_0)} k_b^{-1}}{\left(1 + e^{(G_{Ec} - G_{Oc}) + \ln(C_c / C_0)}\right)^2} p_{II} - \frac{e^{2(G_{Ep} - G_{Op}) + 2 \ln(C_p / C_0)} e^{-2(G_{Oc} - G_{Op})} k_b^{-1} + e^{-2(G_{Ec} - G_{Ep})} k_a}{\left(1 + e^{(G_{Ep} - G_{Op}) + \ln(C_p / C_0)}\right)^2} p_I \\
&= \frac{k_a + e^{2(G_{Ec} - G_{Oc}) + 2 \ln(C_c / C_0)} k_b^{-1}}{\left(1 + e^{(G_{Ec} - G_{Oc}) + \ln(C_c / C_0)}\right)^2} - \left( \frac{k_a + e^{2(G_{Ec} - G_{Oc}) + 2 \ln(C_c / C_0)} k_b^{-1}}{\left(1 + e^{(G_{Ec} - G_{Oc}) + \ln(C_c / C_0)}\right)^2} + \frac{e^{2(G_{Ep} - G_{Op}) + 2 \ln(C_p / C_0)} k_b^{-1} + e^{-2(G_{Ec} - G_{Ep})} k_a}{\left(1 + e^{(G_{Ep} - G_{Op}) + \ln(C_p / C_0)}\right)^2} \right) p_I \\
&= \frac{k_a + e^{2(G_{Ec} - G_{Oc}) + 2 \ln(C_c / C_0)} k_b^{-1}}{\left(1 + e^{(G_{Ec} - G_{Oc}) + \ln(C_c / C_0)}\right)^2} \\
&\quad - \left( \frac{\left(k_a + e^{2(G_{Ec} - G_{Oc}) + 2 \ln(C_c / C_0)} k_b^{-1}\right) \left(1 + e^{(G_{Ep} - G_{Op}) + \ln(C_p / C_0)}\right)^2}{\left(1 + e^{(G_{Ec} - G_{Oc}) + \ln(C_c / C_0)}\right)^2 \left(1 + e^{(G_{Ep} - G_{Op}) + \ln(C_p / C_0)}\right)^2} \right) p_I \\
&\quad - \left( \frac{\left(1 + e^{(G_{Ec} - G_{Oc}) + \ln(C_c / C_0)}\right)^2 \left(e^{2(G_{Ep} - G_{Op}) + 2 \ln(C_p / C_0)} k_b^{-1} + e^{-2(G_{Ec} - G_{Ep})} k_a\right)}{\left(1 + e^{(G_{Ec} - G_{Oc}) + \ln(C_c / C_0)}\right)^2 \left(1 + e^{(G_{Ep} - G_{Op}) + \ln(C_p / C_0)}\right)^2} \right) p_I \\
&= 0
\end{aligned}$$

So,

$$p_I = \frac{A}{A+B},$$

where

$$\begin{aligned} A &= \left( k_a + e^{2(G_{Ec} - G_{Oc}) + 2 \ln(C_c / C_0)} k_b^{-1} \right) \left( 1 + e^{(G_{Ep} - G_{Op}) + \ln(C_p / C_0)} \right)^2 \\ &= \left( k_a + e^{2(G_{Ec} - G_{Oc}) + 2 \ln(C_c / C_0)} k_b^{-1} \right) \left( 1 + e^{(G_{Ep} - G_{Op}) + \ln(C_p / C_0)} \right)^2 \\ &= e^{2(G_{Ec} - G_{Oc}) + 2 \ln(C_p / C_0)} \left( e^{-2(G_{Ec} - G_{Oc}) - 2 \ln(C_p / C_0)} k_a + e^{2 \ln(C_c / C_p)} k_b^{-1} \right) \left( 1 + e^{(G_{Ep} - G_{Op}) + \ln(C_p / C_0)} \right)^2, \\ B &= \left( 1 + e^{(G_{Ec} - G_{Oc}) + \ln(C_c / C_0)} \right)^2 \left( e^{2(G_{Ep} - G_{Oc} + \ln(C_p / C_0))} k_b^{-1} + e^{-2(G_{Ec} - G_{Ep})} k_a \right) \\ &= e^{2(G_{Ep} - G_{Oc}) + 2 \ln(C_p / C_0)} \left( e^{-(G_{Ec} - G_{Oc}) - 2 \ln(C_p / C_0)} + e^{\ln(C_c / C_p)} \right)^2 \left( e^{2(G_{Ec} - G_{Oc} + \ln(C_p / C_0))} k_b^{-1} + k_a \right) \end{aligned}$$

Thus

$$\begin{aligned}
\omega &\propto p_4 k_b - p_5 k_b^{-1} \\
&= \frac{e^{2(G_{Ep}-G_{Op}+\ln(C_p/C_0))}}{\left(1+e^{(G_{Ep}-G_{Op}+\ln(C_p/C_0))}\right)^2} p_I e^{-2(G_{Oc}-G_{Op})} k_b^{-1} - \frac{e^{2(G_{Ec}-G_{Oc})+2\ln(C_c/C_0)}}{\left(1+e^{(G_{Ec}-G_{Oc})+\ln(C_c/C_0)}\right)^2} p_{II} k_b^{-1} \\
&= \frac{e^{2(G_{Ep}-G_{Oc}+\ln(C_p/C_0))}}{\left(1+e^{(G_{Ep}-G_{Op}+\ln(C_p/C_0))}\right)^2} p_I k_b^{-1} - \frac{e^{2(G_{Ec}-G_{Oc})+2\ln(C_c/C_0)}}{\left(1+e^{(G_{Ec}-G_{Oc})+\ln(C_c/C_0)}\right)^2} p_{II} k_b^{-1} \\
&= \left\{ \frac{e^{2(G_{Ep}-G_{Oc}+\ln(C_p/C_0))} A}{\left(1+e^{(G_{Ep}-G_{Op}+\ln(C_p/C_0))}\right)^2} - \frac{e^{2(G_{Ec}-G_{Oc})+2\ln(C_c/C_0)} B}{\left(1+e^{(G_{Ec}-G_{Oc})+\ln(C_c/C_0)}\right)^2} \right\} \frac{1}{A+B} k_b^{-1} \\
&= \frac{\left( e^{2(G_{Ep}-G_{Oc}+\ln(C_p/C_0))} k_a + e^{2(G_{Ep}+G_{Ec}-2G_{Oc}+\ln(C_p C_c/C_0 C_0))} k_b^{-1} \right) - \left( e^{2(G_{Ec}+G_{Ep}-2G_{Oc}+\ln(C_p C_c/C_0 C_0))} k_b^{-1} + e^{2(G_{Ep}-G_{Oc}+\ln(C_c/C_0))} k_a \right)}{A+B} k_b^{-1} \\
&= \frac{e^{2(G_{Ep}-G_{Oc}+\ln(C_p/C_0))} k_a k_b^{-1} \left(1 - e^{2\ln(C_c/C_p)}\right)}{A+B}
\end{aligned}$$

The above result shows that the rotation rate vs. pmf can be written in a form given by Eq. 9 (notice in the experiments of Gabel *et al.*, the ion concentration outside the cell— $C_p$  in the above expressions—can be treated as a constant). A similar analysis using the scheme with two protons

being translated alternately gives the same expression as Eq. 9.

## More on the Torque-Speed Relation

The prediction of the model is shown in Fig. 10. In the experiments of Ryu *et. al.* (23), no measurement was made in the very high-speed region. While the torque-speed curves with different number of stators were extrapolated so they cross at the same position, this trend is not supported by their data. Yet the curve of one stator looks much more like the model developed here predicts. Thus the predicted trend illustrated in Fig. 10 can be checked experimentally.

A possible exception is if the power stroke is shorter so there is a flat region in the potentials. A stator (or half stator) engages to the rotor, exerts a power stroke to push the rotor rotating. At the end of the power stroke, the stator stops, the rotor is free to move forward (under the power stroke of other stators) without the necessity to escape a potential well due to interactions with the stator. In this case, mutual destructive interference of stators may not be observed. Therefore, either proof or disproof of the predictions shown in Fig. 10 gives us some information about the potential forms of the rotor-stator interactions.

## Stator Springs

Each stator is attached to the cell body via an elastic linkage between MotB and the polypeptideglycan. Consequently, a stator may fluctuate around its equilibrium position. To model rotor rotation and the stator fluctuation explicitly, the equations of motion for one stator become:

$$\mathbf{Rotor:} \quad \underbrace{\zeta_R \frac{d\theta}{dt}}_{\text{Viscous drag torque on the rotor}} = - \underbrace{\frac{\partial}{\partial \theta} V_{RS}(s, \theta - \theta_s)}_{\text{Rotor-Stator interaction force}} - \underbrace{\kappa(\theta - \theta_L)}_{\text{Elastic coupling force}} + \underbrace{\sqrt{2k_B T \zeta_R} f_R(t)}_{\text{Brownian torque on the rotor}} \quad (10)$$

$$\mathbf{Load:} \quad \underbrace{\zeta_L \frac{d\theta_L}{dt}}_{\text{Viscous drag force on the Load}} = \underbrace{\kappa(\theta - \theta_L)}_{\text{Elastic coupling force}} + \underbrace{\sqrt{2k_B T \zeta_L} f_L(t)}_{\text{Brownian force on the load}} \quad (11)$$

**Stator:**

$$\underbrace{\zeta_s \frac{d\theta_s}{dt}}_{\text{Viscous drag torque on the stator}} = \underbrace{\frac{\partial}{\partial \theta_s} V_{RS}(s, \theta - \theta_s)}_{\text{Rotor-Stator interaction force}} - \underbrace{\kappa_s (\theta_s - \theta_0)}_{\text{Elastic coupling force}} + \underbrace{\sqrt{2k_B T \zeta_s} f_s(t)}_{\text{Brownian torque on the stator}} \quad (12)$$

In Eq. 12,  $\zeta_s$  is the drag coefficient,  $\theta_s$ , and  $\theta_0$  are the angular position equilibrium position of the stator, and  $\kappa_s$  is spring constant of the stator spring. By averaging Eq. 12, one can show that

$$\left\langle \frac{\partial}{\partial \theta_s} V_{RS}(s, \theta - \theta_s) \right\rangle = \left\langle \kappa_s (\theta_s - \theta_0) \right\rangle. \quad (13)$$

Thus, the stator, on average, tilts opposite to the rotation direction, in accordance with Newton's laws. In the text, the minimum energy path (MEP) is defined by the force balance relation,

$$\frac{\partial}{\partial \theta_s} V_{RS}(s, \theta - \theta_s) = \kappa_s (\theta_s - \theta_0). \quad (14)$$

This constraint reduces the dimension by one. The remaining degrees of freedom are orthogonal to the MEP and are high frequency modes, so that they contribute to the effective drag coefficient and the random force.

Assume that the radii of the rotor and stator are  $\approx 20$  and  $4$  nm, respectively, and the rotor rotates within cytosol of viscosity  $\approx 0.1$  Poise, and the stator moves within the membrane of viscosity about  $10$  Poise. The rotational drag coefficient of the rotor is given by  $\zeta_r^{Rot} \sim 8\pi\eta_w R_r^3$ . Assume that the stator has an ellipsoid shape with vertical axis half the horizontal axis  $R_s$ . Then the translational drag coefficient of the stator is approximately  $\zeta_s^{Trans} \sim 8\pi\eta_m R_s$ . To compare the two terms, we need to transform the latter into a rotational drag coefficient along a circle with radius

$$R_r: \quad \tau_s = \underbrace{F}_{\text{drag torque on the stator}} \cdot R_r = \zeta_s^{Trans} \frac{dx}{dt} R_r = \zeta_s^{Trans} \frac{d\theta_s}{dt} R_r^2 \sim 8\pi\eta_m R_s R_r^2 \frac{d\theta_s}{dt} = \zeta_s^{Rot} \frac{d\theta_s}{dt}. \quad \text{The ratio of the}$$

rotor/stator drag coefficients is  $\frac{\zeta_r^{Rot}}{\zeta_s^{Rot}} \sim \frac{R_r^3 \eta_w}{R_s R_r^2 \eta_m} \sim \frac{1}{20}$ . Given all the uncertainties in our estimation,

and the fact that viscosity contribution may also come from the portion of the connection between the rotor and the flagellum passing through the membrane, the stators move roughly on

the same time scale as the rotor does. Uncertainty of the exact values of the rotor and stator diffusion constants does not affect our ability to fit the motor torque-speed relations, which are mainly determined by the much slower load diffusion constant and effective chemical transition rates.

Explicit treatments of the stator springs does not change the physics revealed by the motor torque-speed relations computed in the text. Indeed, including stator springs makes fitting the data on the rotation speed dependence on pmf easier, since the stator fluctuation characteristic time introduces an extra time scale into the system. Stator fluctuations help the system escape the situation illustrated in Fig. 6a, since the rotor-stator interaction surfaces are no longer rigidly coupled. These fluctuations increase the effective rate constants by broadening the effective transition windows (see Fig. 6c). Modeling the stator springs explicitly dramatically increases the number of degrees of freedom in the model, and so the computational load. Since we focus here on the main physics underlying the motor torque-speed relations, we leave more realistic treatment of the stator springs for a future study. The model system shown in this work should be understood as renormalized system with the stator spring effects implicitly embedded in.

1. Keller, D. & Bustamante, C. (2000) *Biophys. J.* **78**, 541-556.
2. Elston, T. & Peskin, C. (2000) *SIAM J. Appl. Math.* **60**, 842-867.
3. Miyata, M., Ryu, W. & Berg, H. (2002) *J. Bacteriol.* **184**, 1827-1831.
4. Xing, J., Wang, H.-Y. & Oster, G. (2005) *Biophys J* **89**, 1551-1563.
5. Risken, H. (1996) *The Fokker-Planck Equation: Methods of Solutions and Applications* (Springer, New York).
6. Zwanzig, R. (2001) *Nonequilibrium Statistical Mechanics* (Oxford Univ. Press, Oxford).
7. Elston, T. & Oster, G. (1997) *Biophys. J.* **73**, 703-721.
8. Xing, J., Wang, H.-Y., Dimroth, P., von Ballmoos, C. & Oster, G. (2004) *Biophys J* **87**, 2148-2163.
9. Braun, T. F. & Blair, D. F. (2001) *Biochemistry* **40**, 13051-13059.
10. Zhai, Y. F., Heijne, W. & Saier, J., Milton H. (2003) *Biochim. Biophys. Biomembranes* **1614**, 201-210.
11. Zhou, J. D., Sharp, L. L., Tang, H. L., Lloyd, S. A., Billings, S., Braun, T. F. & Blair, D.



- F. (1998) *J. Bacteriol.* **180**, 2729-2735.
12. Marcus, R. A. (1956) *J. Chem. Phys.* **24**, 966-978.
  13. Marcus, R. A. (1999) *Adv. Chem. Phys.* **106**, 1-6.
  14. Chen, X. & Berg, H. (2000) *Biophys. J.* **78**, 2280-2284.
  15. Schmitt, R. (2003) *Biophys. J.* **85**, 843-52.
  16. Braun, T. F., Poulson, S., Gully, J. B., Empey, J. C., Van Way, S., Putnam, A. & Blair, D. F. (1999) *J. Bacteriol.* **181**, 3542-3551.
  17. Berg, H. C. (2003) *Annu. Rev. Biochem.* **72**, 19-54.
  18. Lauger, P. (1990) *Comments Theor. Biol.* **2**, 99-123.
  19. Kojima, S. & Blair, D. (2001) *Biochemistry* **40**, 13041-13050.
  20. Blair, D. F. (2003) *FEBS Lett.* **545**, 86-95.
  21. Thomas, D., Morgan, D. & DeRosier, D. (1999) *Proc. Natl. Acad. Sci. USA* **96**, 10134-10139.
  22. Gabel, C. & Berg, H. (2003) *Proc. Natl. Acad. Sci. USA* **100**, 8748-8751.
  23. Ryu, W., Berry, R. & Berg, H. (2000) *Nature* **403**, 444-447.
