# Supplementary material
Source: PubMed Central journal article supplement (PMC1360542)

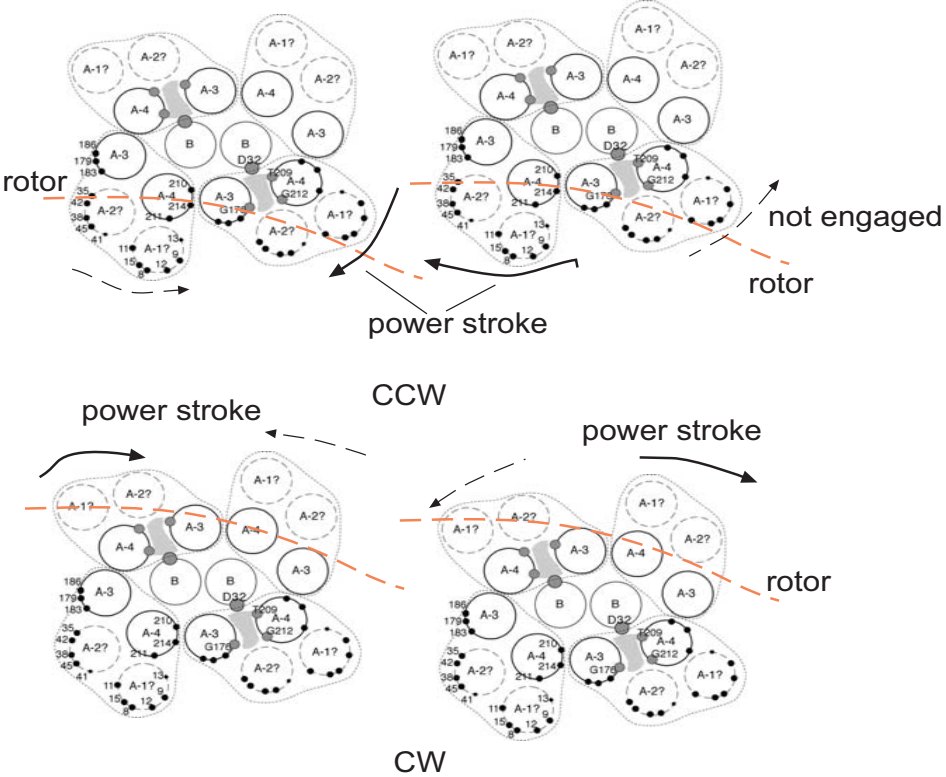

(a)

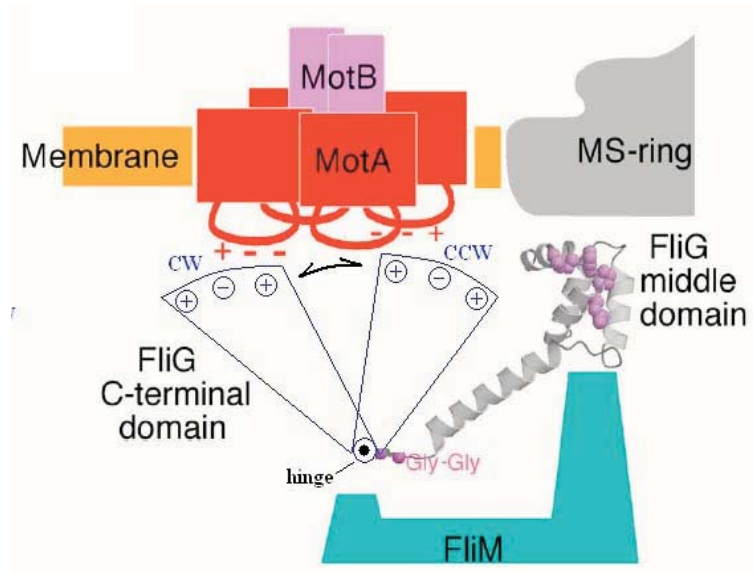

(b)

Supplement: pnas_0507959103_1.pdf [file pnas_0507959103_1.pdf]

Potential

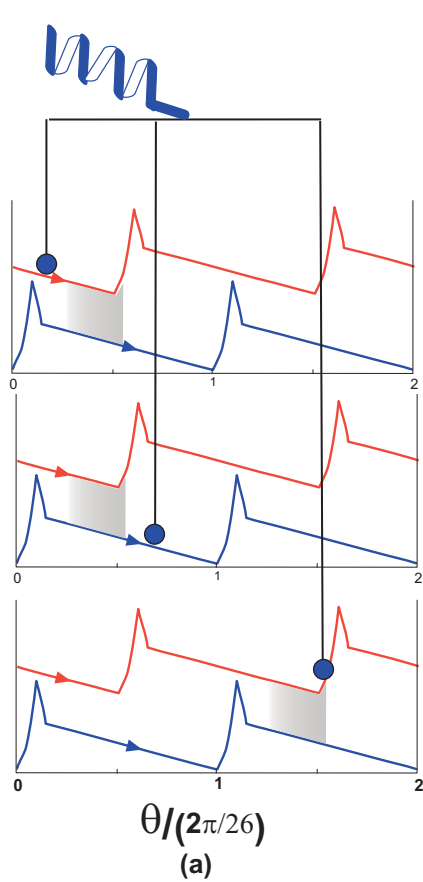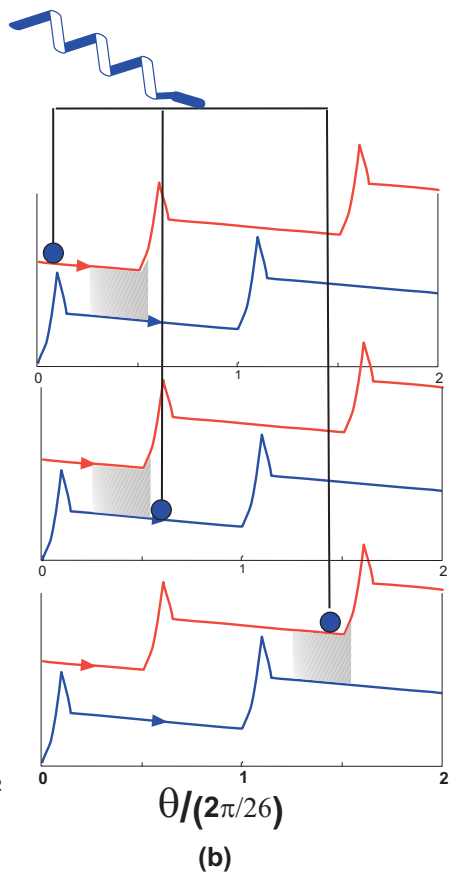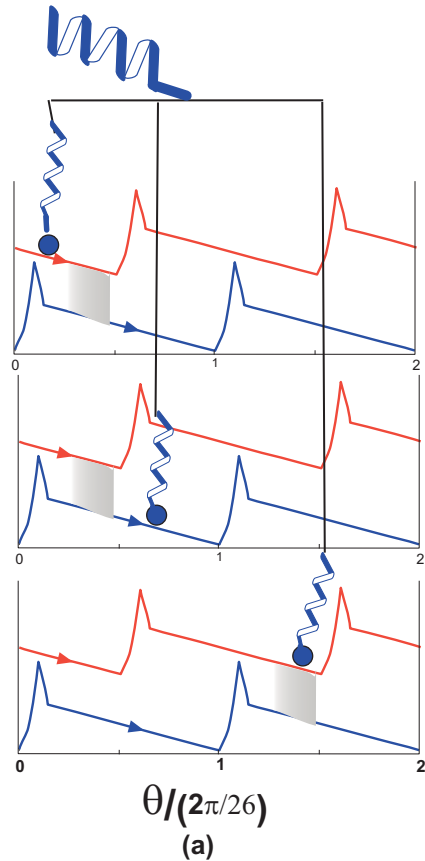

Supplement: pnas_0507959103_2.pdf [file pnas_0507959103_2.pdf]

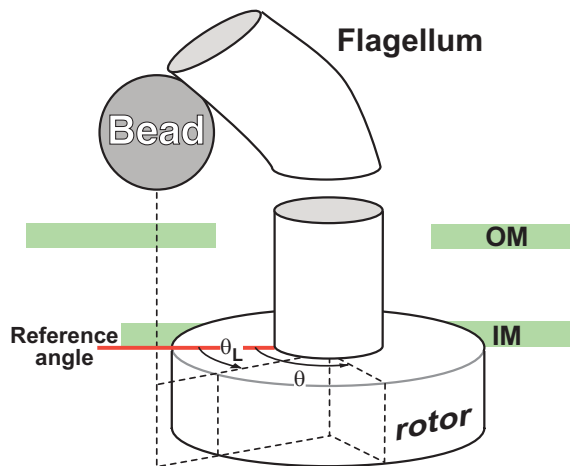

(a)

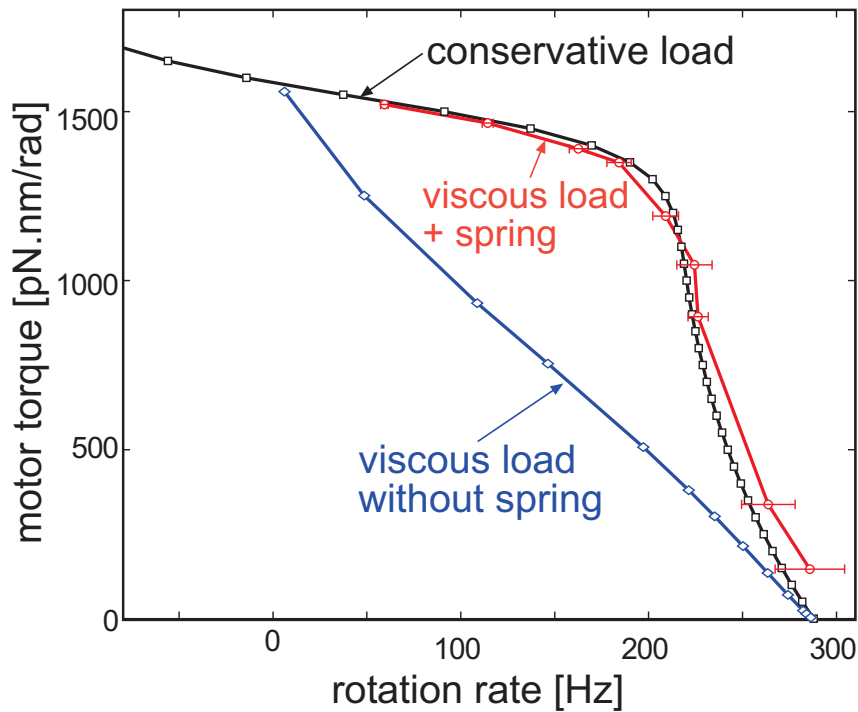

(b)

Supplement: pnas_0507959103_3.pdf [file pnas_0507959103_3.pdf]

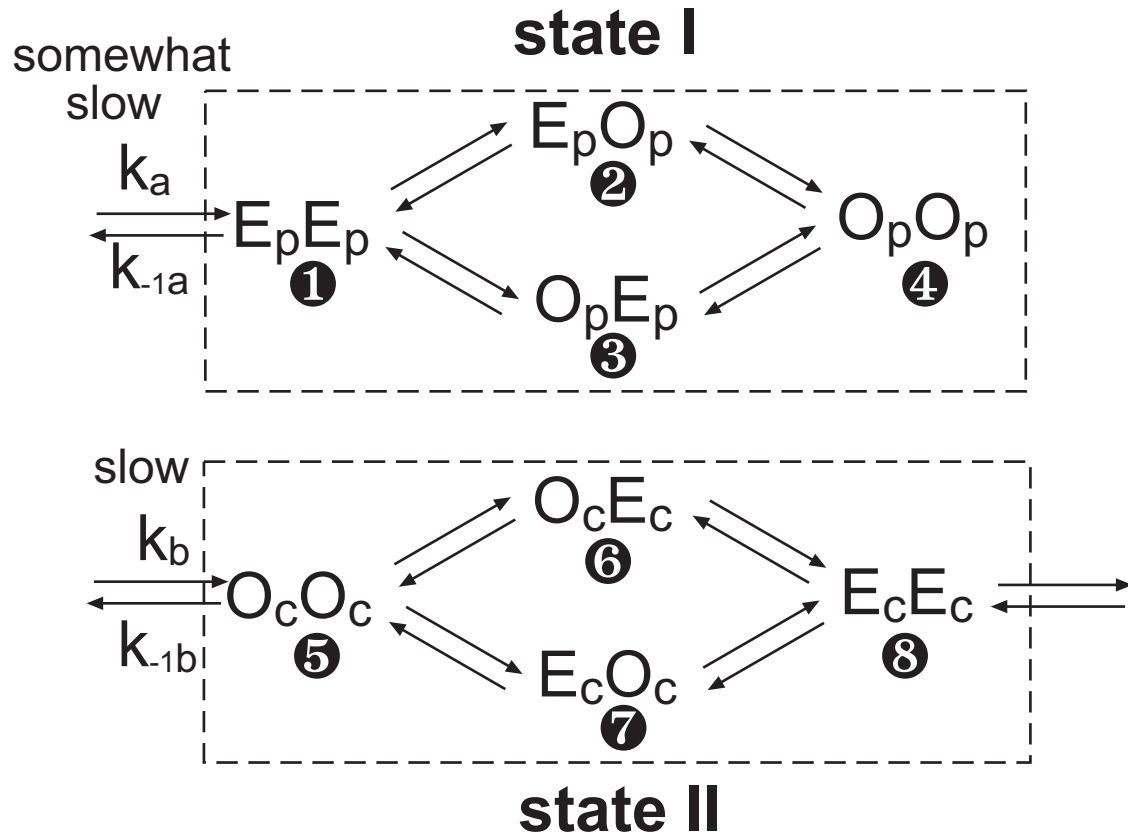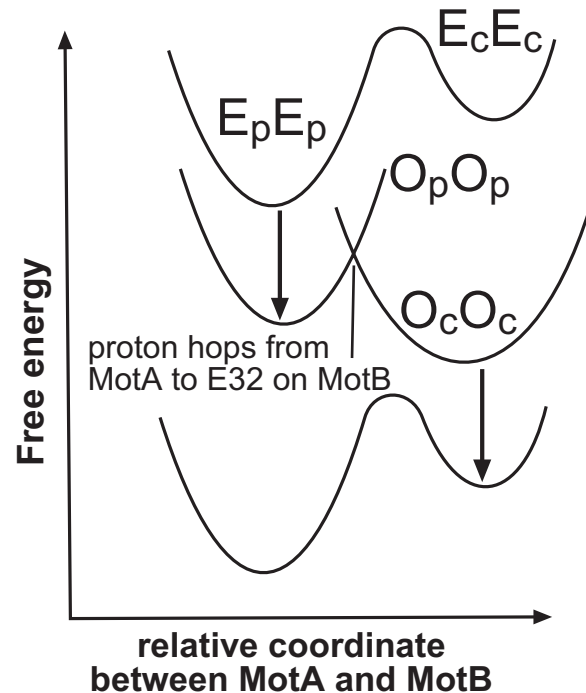

Supplement: pnas_0507959103_4.pdf [file pnas_0507959103_4.pdf]

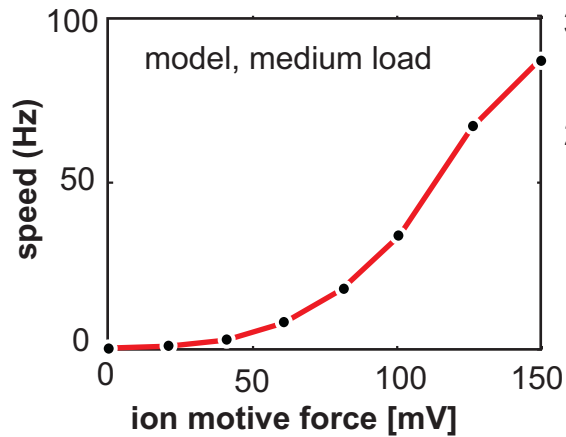

(a)

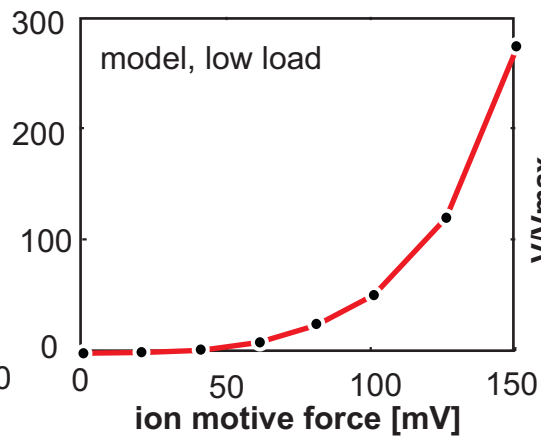

(b)

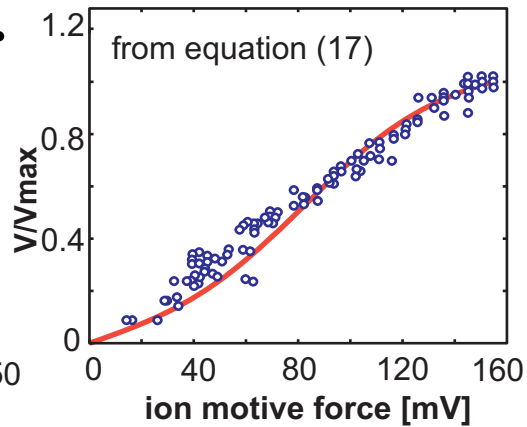

(c)

Supplement: pnas_0507959103_5.pdf [file pnas_0507959103_5.pdf]

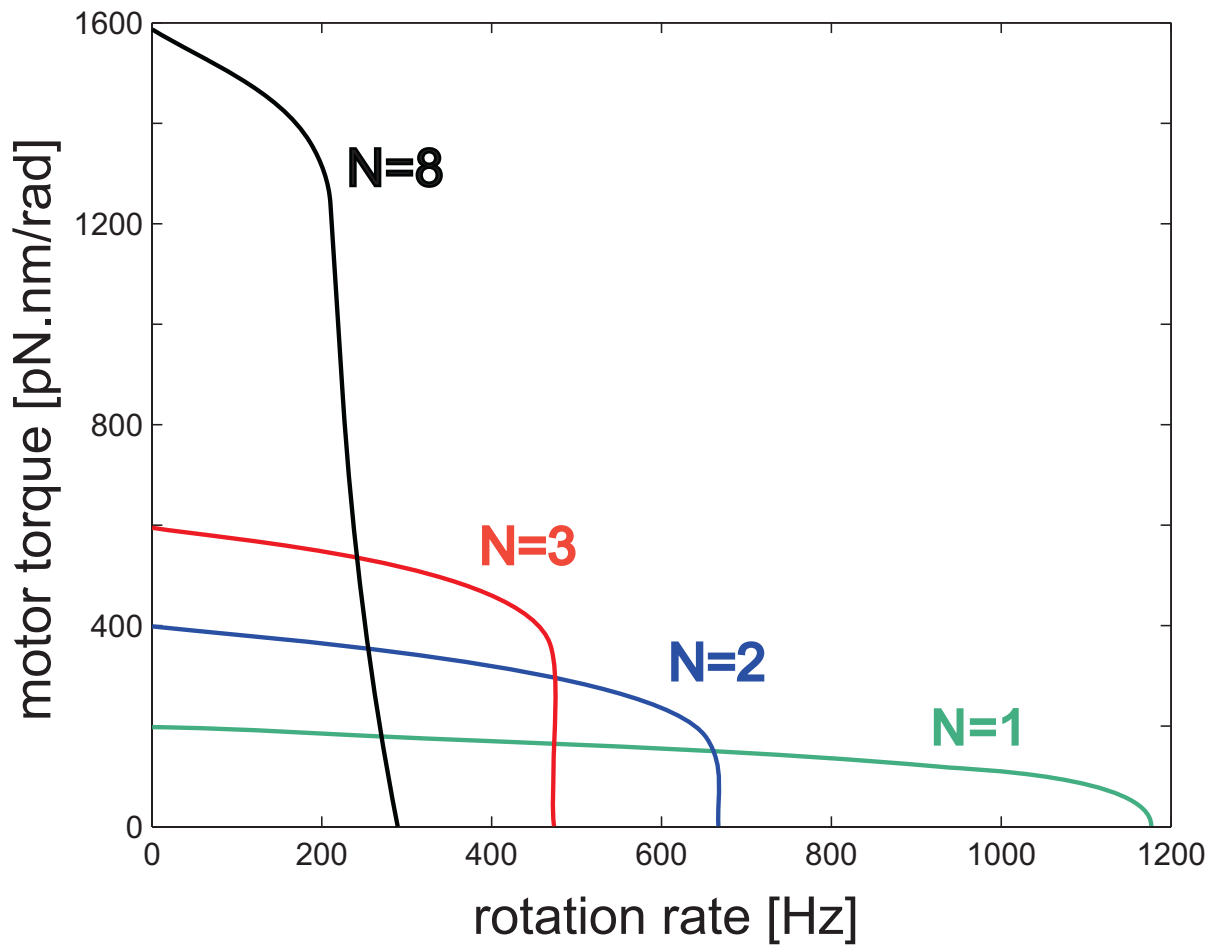

Supplement: pnas_0507959103_6.pdf [file pnas_0507959103_6.pdf]

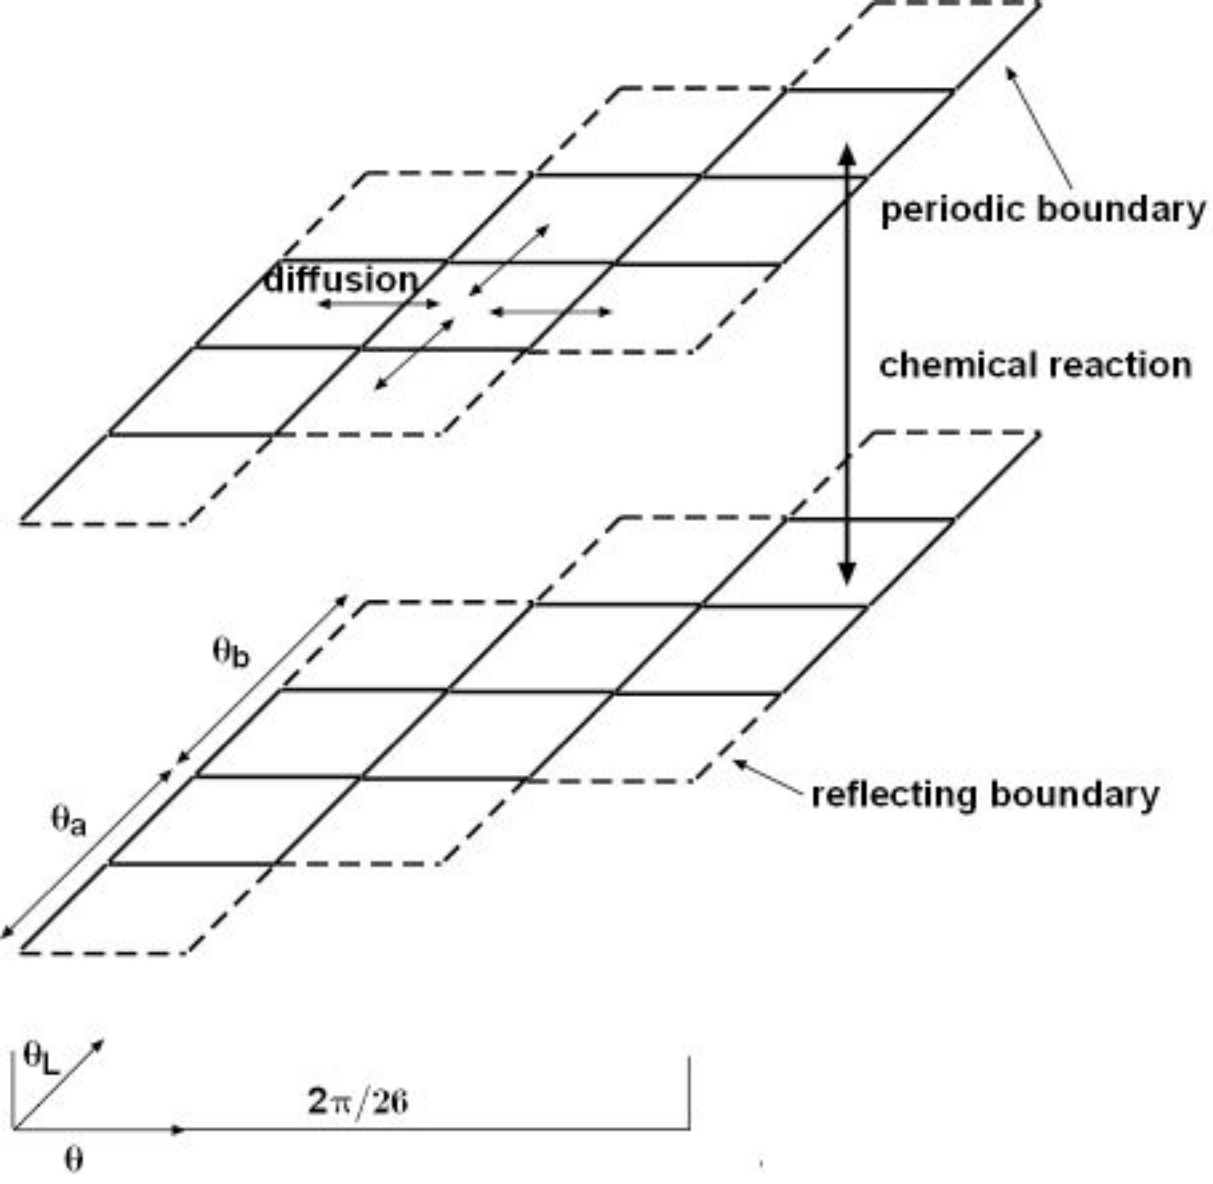

Supplement: pnas_0507959103_7.pdf [file pnas_0507959103_7.pdf]

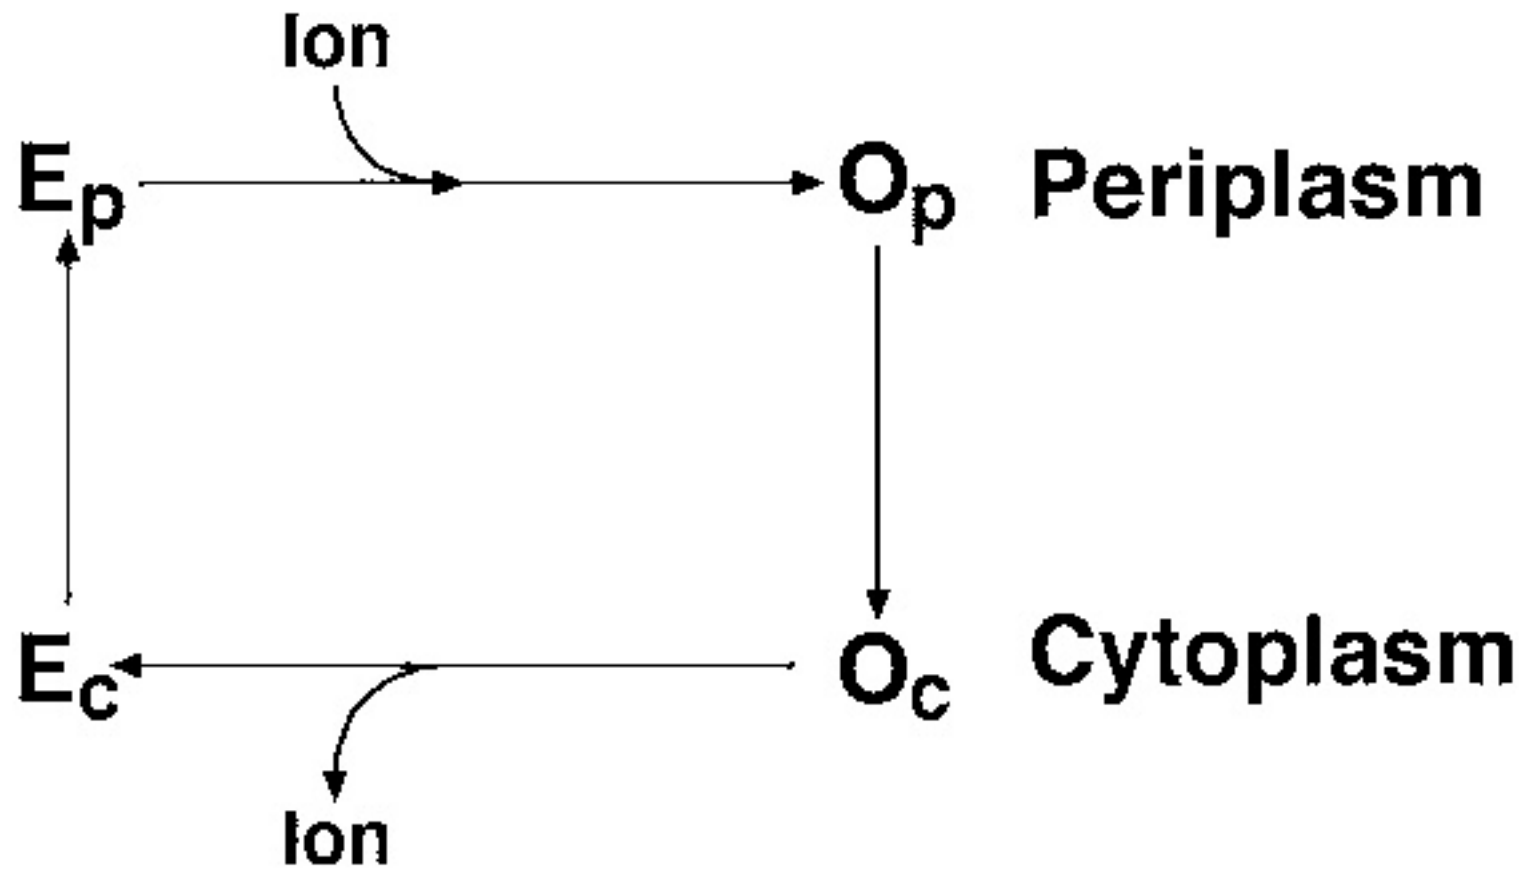

Supplement: pnas_0507959103_8.pdf [file pnas_0507959103_8.pdf]
